# Supplementary material for: Reshaping Globular Dynamics of S.aureus Pyruvate Kinase via Bond Restraints to Allosteric Sites
Source: Research Square preprint supplement (doi:10.21203/rs.3.rs-7599593/v1), 2025-09-15
Supplement: Supplementary file 1 [file c3807e6db49bc4515447a08e.docx]

SUPPLEMENTARY MATERIAL

Reshaping Globular Dynamics of *S.aureus* Pyruvate Kinase via Bond Restraints to Allosteric Sites

##

## Vahap Gazi Fidan1,2,Dilvin Aydin1, Irem Yazgi1, E. Demet Akten1,*

*1Department of Molecular Biology and Genetics, Faculty of Engineering and Natural Sciences, Kadir Has University, Istanbul, Turkey*

*2Department of Chemical and Biological Engineering, Koç University, 34450 Istanbul, Turkey*

*Corresponding Author

[demet.akten@khas.edu.tr](mailto:demet.akten@khas.edu.tr)

+90 212 533 65 32 (x1350)

<https://orcid.org/0000-0002-0358-3171>

**Supplementary Table 1.** Selected residue pairs for bond restraints and their corresponding distance values.

| **Constrained Allosteric Site** | **Selected Residue Pairs** | **Distance (Å)** |
| --- | --- | --- |
| Proposed allosteric site  (rstr-prop) | LYS260A* – ALA337D | 9.80 |
| ARG264A – GLN338D | 12.08 |
| ILE302A – ARG264D | 15.06 |
| LYS342A – LYS342D | 11.00 |
| ILE303D – LYS346D | 11.08 |
| ILE302D – LYS339D | 10.04 |
| LYS260C – ALA337B | 9.7 |
| ARG264C – GLN338B | 12.06 |
| ILE302C – ARG264B | 15.07 |
| LYS342C – LYS342B | 10.09 |
| ILE303B – LYS346B | 11.8 |
| ILE302B – LYS339B | 10.04 |
| Experimental allosteric site  (rstr-exp) | ALA358A – LEU370B | 8.22 |
| SER362A – THR366B | 7.93 |
| THR366A – SER362B | 7.91 |
| LEU370A – ALA358B | 8.13 |
| ALA358C – LEU370D | 8.18 |
| SER362C – THR366D | 7.91 |
| THR366C – SER362D | 7.92 |
| LEU370C – ALA358D | 8.14 |

* chain ID
